# Supplementary material for: CellMapper: rapid and accurate inference of gene expression in difficult-to-isolate cell types
Source: PubMed Central journal article supplement (PMC5043525; doi:10.1186/s13059-016-1062-5), 2016-09-29

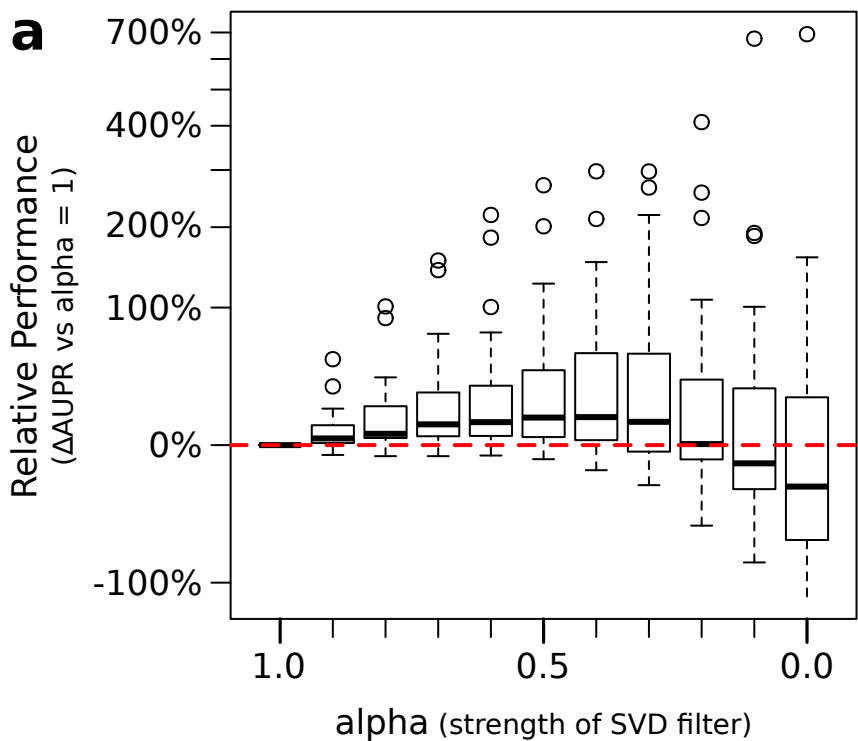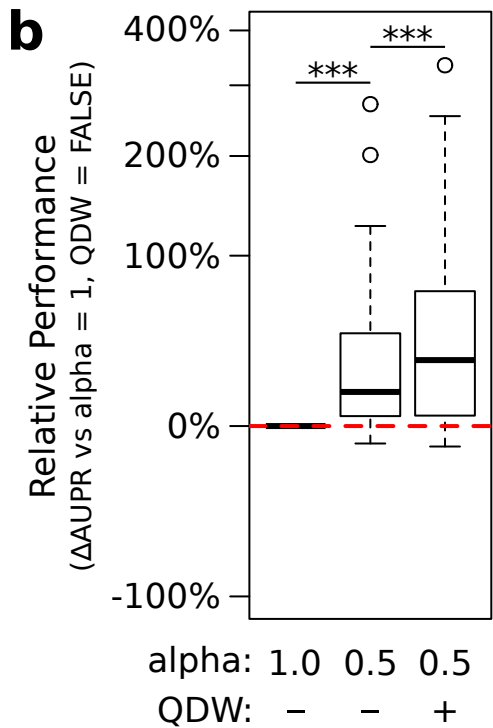

Supplement: 13059_2016_1062_MOESM4_ESM.pdf [file 13059_2016_1062_MOESM4_ESM.pdf]
