# Supplementary material for: CellMapper: rapid and accurate inference of gene expression in difficult-to-isolate cell types
Source: PubMed Central journal article supplement (PMC5043525; doi:10.1186/s13059-016-1062-5), 2016-09-29
Supplement: 13059_2016_1062_MOESM12_ESM.pdf [file 13059_2016_1062_MOESM12_ESM.pdf]

### Additional file 13: Cell Types and Query Genes

| Cell Type                      | Query Gene     | Dataset(s) Analyzed                                                        |
|--------------------------------|----------------|----------------------------------------------------------------------------|
| GABAergic Neurons              | <i>GAD1</i>    | Allen Brain Atlas                                                          |
| Noradrenergic Neurons          | <i>SLC2A2</i>  | Allen Brain Atlas                                                          |
| Serotonergic Neurons           | <i>SLC2A4</i>  | Allen Brain Atlas                                                          |
| NG2 Glia                       | <i>PDGFRA</i>  | Allen Brain Atlas                                                          |
| Neurons                        | <i>L1CAM</i>   | Allen Brain Atlas                                                          |
| Astrocytes                     | <i>ALDH1L1</i> | Allen Brain Atlas                                                          |
| Oligodendrocytes (Myelinating) | <i>MOG</i>     | Allen Brain Atlas                                                          |
| Microglia                      | <i>PTPRC</i>   | Allen Brain Atlas                                                          |
| Adipocytes                     | <i>FABP4</i>   | Engreitz, et al. (2010), Lukk, et al. (2010), Zheng-Bradley, et al. (2010) |
| B Cells                        | <i>CD19</i>    | Engreitz, et al. (2010), Lukk, et al. (2010), Zheng-Bradley, et al. (2010) |
| Cardiomyocytes                 | <i>TNNI3</i>   | Engreitz, et al. (2010), Lukk, et al. (2010), Zheng-Bradley, et al. (2010) |
| Chondrocytes                   | <i>ACAN</i>    | Engreitz, et al. (2010), Lukk, et al. (2010), Zheng-Bradley, et al. (2010) |
| Endothelial Cells              | <i>TEK</i>     | Engreitz, et al. (2010), Lukk, et al. (2010), Zheng-Bradley, et al. (2010) |
| Erythrocytes                   | <i>EPB42</i>   | Engreitz, et al. (2010), Lukk, et al. (2010), Zheng-Bradley, et al. (2010) |
| Macrophages                    | <i>CD163</i>   | Engreitz, et al. (2010), Lukk, et al. (2010), Zheng-Bradley, et al. (2010) |
| NK Cells                       | <i>NCR1</i>    | Engreitz, et al. (2010), Lukk, et al. (2010), Zheng-Bradley, et al. (2010) |
| Osteoblasts                    | <i>IBSP</i>    | Engreitz, et al. (2010), Lukk, et al. (2010), Zheng-Bradley, et al. (2010) |
| Platelets                      | <i>PF4</i>     | Engreitz, et al. (2010), Lukk, et al. (2010), Zheng-Bradley, et al. (2010) |
| Pluripotent Stem Cells         | <i>NANOG</i>   | Engreitz, et al. (2010), Lukk, et al. (2010), Zheng-Bradley, et al. (2010) |
| Schwann Cells (Myelinating)    | <i>MPZ</i>     | Engreitz, et al. (2010), Lukk, et al. (2010), Zheng-Bradley, et al. (2010) |
| Simple Epithelial Cells        | <i>KRT8</i>    | Engreitz, et al. (2010), Lukk, et al. (2010), Zheng-Bradley, et al. (2010) |
| Skeletal Muscle Cells          | <i>TNNT3</i>   | Engreitz, et al. (2010), Lukk, et al. (2010), Zheng-Bradley, et al. (2010) |
| Smooth Muscle Cells            | <i>MYH11</i>   | Engreitz, et al. (2010), Lukk, et al. (2010), Zheng-Bradley, et al. (2010) |

|                             |              |                                                                              |
|-----------------------------|--------------|------------------------------------------------------------------------------|
|                             |              | et al. (2010)                                                                |
| Stratified Epithelial Cells | <i>KRT5</i>  | Engreitz, et al. (2010), Lukk, et al. (2010), Zheng-Bradley, et al. (2010)   |
| T Cells                     | <i>CD3D</i>  | Engreitz, et al. (2010), Lukk, et al. (2010), Zheng-Bradley, et al. (2010)   |
| Enterocytes                 | <i>ALPI</i>  | Intestine-specific subset of Engreitz, et al. (2010) and Lukk, et al. (2010) |
| Enteroendocrine Cells       | <i>CHGA</i>  | Intestine-specific subset of Engreitz, et al. (2010) and Lukk, et al. (2010) |
| Goblet Cells                | <i>MUC2</i>  | Intestine-specific subset of Engreitz, et al. (2010) and Lukk, et al. (2010) |
| Paneth Cells                | <i>DEFA5</i> | Intestine-specific subset of Engreitz, et al. (2010) and Lukk, et al. (2010) |
| Podocytes                   | <i>PTPRO</i> | Kidney microarray data from Ju, et al. (2013)                                |
